# Supplementary material
Source: publisher figshare collection journal article supplement (https://brill.figshare.com/articles/dataset/_/26135329)
Supplement: Supplementary file 1 [file 1]

## Sheet: Table S4
Transcript family	Name transcript	Midgut region tissue	Samples	NRQ	Mean	SEM	p-value
Trypsin-like	Try_DN11026	Anterior	S1_s-OFMSW	5.54608e-05	4.4471e-05	1.09898e-05	ns	>0,9999
			S2_s-OFMSW	3.34812e-05
		Anterior	S1_modified s-OFMSW	0.000118093	0.000118093	2.92774e-05
			S2_modified s-OFMSW	2.92774e-05
		Middle	S1_s-OFMSW	0.000112427	0.000119766	7.3395e-06	ns	>0,9999
			S2_s-OFMSW	0.000127106
		Middle	S1_modified s-OFMSW	0.00705026	0.00741487	0.000364613
			S2_modified s-OFMSW	0.00777948
		Posterior	S1_s-OFMSW	110.552	69.8865	20.3534	*	0.0197
			S2_s-OFMSW	47.9664
			S3_s-OFMSW	51.141
		Posterior	S1_modified s-OFMSW	16.5472	17.2223	2.29042
			S2_modified s-OFMSW	13.636
			S3_modified s-OFMSW	21.4837
	Try_DN13300	Anterior	S1_s-OFMSW	0.000108595	0.000104418	4.1765e-06	ns	>0,9999
			S2_s-OFMSW	0.000100242
		Anterior	S1_modified s-OFMSW	0.00025337	0.00028028	2.691e-05
			S2_modified s-OFMSW	0.00030719
		Middle	S1_s-OFMSW	0.000158029	0.000161343	3.314e-06	ns	>0,9999
			S2_s-OFMSW	0.000164657
		Middle	S1_modified s-OFMSW	0.0126944	0.0137267	0.0010323
			S2_modified s-OFMSW	0.014759
		Posterior	S1_s-OFMSW	4.65238	4.18023	0.210455	****	<0,0001
			S2_s-OFMSW	3.62997
			S3_s-OFMSW	4.18233
			S4_s-OFMSW	4.25623
		Posterior	S1_modified s-OFMSW	67.7996	64.3718	9.87775
			S2_modified s-OFMSW	55.5024
			S3_modified s-OFMSW	90.1753
			S4_modified s-OFMSW	44.01
	Try_DN11081	Anterior	S1_s-OFMSW	0.000238731	0.000204552	3.4179e-05	ns	>0,9999
			S2_s-OFMSW	0.000170373
		Anterior	S1_modified s-OFMSW	0.000498547	0.000466007	3.254e-05
			S2_modified s-OFMSW	0.000433467
		Middle	S1_s-OFMSW	0.000546138	0.000628711	8.2573e-05	ns	>0,9999
			S2_s-OFMSW	0.000711284
		Middle	S1_modified s-OFMSW	0.00262737	0.00306317	0.000435801
			S2_modified s-OFMSW	0.00349897
		Posterior	S1_s-OFMSW	2.15918	3.55042	1.43965	***	0.0007
			S2_s-OFMSW	1.5754
			S3_s-OFMSW	2.6481
			S4_s-OFMSW	7.819
		Posterior	S1_modified s-OFMSW	164.228	109.852	24.4094
			S2_modified s-OFMSW	125.804
			S3_modified s-OFMSW	101.757
			S4_modified s-OFMSW	47.618
Chymotrypsin-like	Chy_DN12383	Anterior	S1_s-OFMSW	0.000884593	0.000817344	6.72485e-05	ns	>0,9999
			S2_s-OFMSW	0.000750096
		Anterior	S1_modified s-OFMSW	0.00071578	0.000805086	8.9306e-05
			S2_modified s-OFMSW	0.000894392
		Middle	S1_s-OFMSW	6.2466e-05	7.10365e-05	8.57045e-06	ns	>0,9999
			S2_s-OFMSW	7.96069e-05
		Middle	S1_modified s-OFMSW	0.00191118	0.00216629	0.000255117
			S2_modified s-OFMSW	0.00242141
		Posterior	S1_s-OFMSW	21.2454	24.6376	7.96646	ns	0.3136
			S2_s-OFMSW	17.3664
			S3_s-OFMSW	47.8626
			S4_s-OFMSW	12.076
		Posterior	S1_modified s-OFMSW	9.88079	12.5788	4.39719
			S2_modified s-OFMSW	8.62929
			S3_modified s-OFMSW	25.5734
			S4_modified s-OFMSW	6.23172
	Chy_DN8352	Anterior	S1_s-OFMSW	0.00191785	0.0019957	7.78555e-05	ns	>0,9999
			S2_s-OFMSW	0.00207356
		Anterior	S1_modified s-OFMSW	0.0114468	0.014641	0.00319422
			S2_modified s-OFMSW	0.0178352
		Middle	S1_s-OFMSW	0.00132446	0.0012935	3.09625e-05	ns	>0,9999
			S2_s-OFMSW	0.00126253
		Middle	S1_modified s-OFMSW	0.00141777	0.00116138	0.000256395
			S2_modified s-OFMSW	0.000904984
		Posterior	S1_s-OFMSW	5.70921	10.3682	2.72624	ns	0.9997
			S2_s-OFMSW	5.75518
			S3_s-OFMSW	13.7355
			S4_s-OFMSW	16.2728
		Posterior	S1_modified s-OFMSW	5.57648	10.0215	4.58274
			S2_modified s-OFMSW	5.397
			S3_modified s-OFMSW	5.34373
			S4_modified s-OFMSW	23.769
	Chy_DN8552	Anterior	S1_s-OFMSW	0.000696427	0.00057887	0.000117557	ns	>0,9999
			S2_s-OFMSW	0.000461312
		Anterior	S1_modified s-OFMSW	0.00133558	0.00174124	0.000405661
			S2_modified s-OFMSW	0.00214691
		Middle	S1_s-OFMSW	0.000731974	0.000658575	7.3399e-05	ns	>0,9999
			S2_s-OFMSW	0.000585176
		Middle	S1_modified s-OFMSW	0.00161101	0.0017906	0.000179598
			S2_modified s-OFMSW	0.0019702
		Posterior	S1_s-OFMSW	11.8369	16.6873	5.51292	ns	0.682
			S2_s-OFMSW	16.1117
			S3_s-OFMSW	6.63066
			S4_s-OFMSW	32.17
		Posterior	S1_modified s-OFMSW	8.84521	11.522	3.12619
			S2_modified s-OFMSW	10.6071
			S3_modified s-OFMSW	6.14752
			S4_modified s-OFMSW	20.488
	Chy_DN9167	Anterior	S1_s-OFMSW	3.54121e-05	6.68778e-05	3.14658e-05	ns	>0,9999
			S2_s-OFMSW	9.83436e-05
		Anterior	S1_modified s-OFMSW	3.88439e-05	0.000115043	7.6199e-05
			S2_modified s-OFMSW	0.000191242
		Middle	S1_s-OFMSW	0.000897995	0.000729318	0.000168678	ns	>0,9999
			S2_s-OFMSW	0.00056064
		Middle	S1_modified s-OFMSW	0.0110743	0.0181326	0.00705833
			S2_modified s-OFMSW	0.025191
		Posterior	S1_s-OFMSW	2.85581	10.4345	4.55574	**	0.0025
			S2_s-OFMSW	15.6326
			S3_s-OFMSW	2.63135
			S4_s-OFMSW	20.6184
		Posterior	S1_modified s-OFMSW	21.2713	33.2079	4.27694
			S2_modified s-OFMSW	38.8169
			S3_modified s-OFMSW	39.9454
			S4_modified s-OFMSW	32.7978
Aminopeptidase N-like	APN_DN10599	Anterior	S1_s-OFMSW	0.00239346	0.00172698	0.000666484	ns	>0,9999
			S2_s-OFMSW	0.0010605
		Anterior	S1_modified s-OFMSW	0.00258045	0.00206909	0.000511355
			S2_modified s-OFMSW	0.00155774
		Middle	S1_s-OFMSW	0.0137993	0.0136702	0.000129034	ns	>0,9999
			S2_s-OFMSW	0.0135412
		Middle	S1_modified s-OFMSW	0.00964022	0.00957778	6.2435e-05
			S2_modified s-OFMSW	0.00951534
		Posterior	S1_s-OFMSW	5.12101	7.2392	2.35436	ns	0.0548
			S2_s-OFMSW	5.26119
			S3_s-OFMSW	14.2737
			S4_s-OFMSW	4.30094
		Posterior	S1_modified s-OFMSW	12.1628	8.79944	1.90311
			S2_modified s-OFMSW	11.8242
			S3_modified s-OFMSW	4.46597
			S4_modified s-OFMSW	6.74479
	APN_DN10282	Anterior	S1_s-OFMSW	0.00145951	0.00160057	0.000141063	ns	>0,9999
			S2_s-OFMSW	0.00174163
		Anterior	S1_modified s-OFMSW	0.00111336	0.00151264	0.000399282
			S2_modified s-OFMSW	0.00191193
		Middle	S1_s-OFMSW	0.00304644	0.00236851	0.000677926	ns	>0,9999
			S2_s-OFMSW	0.00169059
		Middle	S1_modified s-OFMSW	0.00461804	0.00472032	0.00010228
			S2_modified s-OFMSW	0.0048226
		Posterior	S1_s-OFMSW	7.77433	8.99165	1.21061	ns	0.8319
			S2_s-OFMSW	7.78775
			S3_s-OFMSW	11.4129
		Posterior	S1_modified s-OFMSW	28.2471	19.329	4.00035
			S2_modified s-OFMSW	23.1516
			S3_modified s-OFMSW	10.0668
			S4_modified s-OFMSW	15.8505
α-amylase-like	α-Am_DN8927	Anterior	S1_s-OFMSW	2.18739	1.77638	0.230908	****	<0,0001
			S2_s-OFMSW	1.73091
			S3_s-OFMSW	2.04196
			S4_s-OFMSW	1.14528
		Anterior	S1_modified s-OFMSW	4.70787	6.35992	1.00362
			S2_modified s-OFMSW	6.19862
			S3_modified s-OFMSW	8.17327
		Middle	S1_s-OFMSW	0.00173322	0.00185923	0.000126004	ns	>0,9999
			S2_s-OFMSW	0.00198523
		Middle	S1_modified s-OFMSW	0.0101415	0.00991408	0.000227436
			S2_modified s-OFMSW	0.00968665
		Posterior	S1_s-OFMSW	1.46205	2.09305	0.593413	ns	0.2542
			S2_s-OFMSW	1.53803
			S3_s-OFMSW	3.27906
		Posterior	S1_modified s-OFMSW	0.594367	0.848982	0.253871
			S2_modified s-OFMSW	0.445172
			S3_modified s-OFMSW	0.772761
			S4_modified s-OFMSW	1.58363
	α-Am_DN7964_i1	Anterior	S1_s-OFMSW	2.53387	2.13777	0.193779	***	0.0001
			S2_s-OFMSW	2.31069
			S3_s-OFMSW	2.07901
			S4_s-OFMSW	1.62752
		Anterior	S1_modified s-OFMSW	0.76744	0.581086	0.118597
			S2_modified s-OFMSW	0.571446
			S3_modified s-OFMSW	0.735987
			S4_modified s-OFMSW	0.249471
		Middle	S1_s-OFMSW	0.0705228	0.0818928	0.01137	ns	0.9998
			S2_s-OFMSW	0.0932628
		Middle	S1_modified s-OFMSW	0.108848	0.107081	0.00176711
			S2_modified s-OFMSW	0.105314
		Posterior	S1_s-OFMSW	2.57412	2.58502	0.346584	***	0.0005
			S2_s-OFMSW	3.1907
			S3_s-OFMSW	1.99024
		Posterior	S1_modified s-OFMSW	0.96802	1.1454	0.167757
			S2_modified s-OFMSW	0.845888
			S3_modified s-OFMSW	1.61059
			S4_modified s-OFMSW	1.15711
Lipase-like	Li_DN10934	Anterior	S1_s-OFMSW	0.000569084	0.000843027	0.000273943	ns	>0,9999
			S2_s-OFMSW	0.00111697
		Anterior	S1_modified s-OFMSW	0.000553416	0.000790562	0.000237146
			S2_modified s-OFMSW	0.00102771
		Middle	S1_s-OFMSW	0.000601111	0.00115725	0.000556143	ns	>0,9999
			S2_s-OFMSW	0.0017134
		Middle	S1_modified s-OFMSW	0.00138549	0.00170758	0.000322089
			S2_modified s-OFMSW	0.00202966
		Posterior	S1_s-OFMSW	6.66756	5.78517	0.53323	****	<0,0001
			S2_s-OFMSW	6.37267
			S3_s-OFMSW	5.82737
			S4_s-OFMSW	4.27306
		Posterior	S1_modified s-OFMSW	24.8319	27.2684	2.96122
			S2_modified s-OFMSW	21.9445
			S3_modified s-OFMSW	35.6671
			S4_modified s-OFMSW	26.6302
	Li_DN7589	Anterior	S1_s-OFMSW	0.0112949	0.00984755	0.00144732	ns	>0,9999
			S2_s-OFMSW	0.00840022
		Anterior	S1_modified s-OFMSW	0.021293	0.0194761	0.00181691
			S2_modified s-OFMSW	0.0176591
		Middle	S1_s-OFMSW	0.00927245	0.0118622	0.00258973	ns	>0,9999
			S2_s-OFMSW	0.0144519
		Middle	S1_modified s-OFMSW	0.0157542	0.0207918	0.00503768
			S2_modified s-OFMSW	0.0258295
		Posterior	S1_s-OFMSW	4.56971	6.6585	1.52946	ns	0.2813
			S2_s-OFMSW	4.64783
			S3_s-OFMSW	11.0812
			S4_s-OFMSW	6.33521
		Posterior	S1_modified s-OFMSW	5.37047	4.13976	0.986071
			S2_modified s-OFMSW	5.10168
			S3_modified s-OFMSW	4.89065
			S4_modified s-OFMSW	1.19625
	Li_DN10724	Anterior	S1_s-OFMSW	0.00174715	0.00185815	0.00011101	ns	>0,9999
			S2_s-OFMSW	0.00196916
		Anterior	S1_modified s-OFMSW	0.00169751	0.00218089	0.000483384
			S2_modified s-OFMSW	0.00266428
		Middle	S1_s-OFMSW	0.00222872	0.00266202	0.000433293	ns	>0,9999
			S2_s-OFMSW	0.00309531
		Middle	S1_modified s-OFMSW	0.00201295	0.00227694	0.000263989
			S2_modified s-OFMSW	0.00254093
		Posterior	S1_s-OFMSW	17.9949	14.437	3.6495	ns	0.111
			S2_s-OFMSW	16.5279
			S3_s-OFMSW	19.5765
			S4_s-OFMSW	3.64895
		Posterior	S1_modified s-OFMSW	7.05161	7.39665	1.11326
			S2_modified s-OFMSW	10.1084
			S3_modified s-OFMSW	7.72966
			S4_modified s-OFMSW	4.69693
	Li_DN8244	Anterior	S1_s-OFMSW	25.0848	19.6759	4.30175	**	0.0027
			S2_s-OFMSW	27.1269
			S3_s-OFMSW	8.02113
			S4_s-OFMSW	18.4705
		Anterior	S1_modified s-OFMSW	2.75262	3.96184	0.762732
			S2_modified s-OFMSW	3.23893
			S3_modified s-OFMSW	3.67695
			S4_modified s-OFMSW	6.17886
		Middle	S1_s-OFMSW	0.0551011	0.0528137	0.00228741	ns	>0,9999
			S2_s-OFMSW	0.0505263
		Middle	S1_modified s-OFMSW	0.00150795	0.00133876	0.000169191
			S2_modified s-OFMSW	0.00116957
		Posterior	S1_s-OFMSW	0.000173738	0.000272073	9.83345e-05	ns	>0,9999
			S2_s-OFMSW	0.000370407
		Posterior	S1_modified s-OFMSW	0.000680553	0.000679873	6.795e-07
			S2_modified s-OFMSW	0.000679194
