# Supplementary material
Source: publisher figshare collection journal article supplement (https://brill.figshare.com/articles/dataset/_/26135329)
Supplement: Supplementary file 1 [file 1]

RESEARCH ARTICLE

**Black soldier fly larvae efficiently bioconvert the organic fraction of municipal solid waste thanks to the functional plasticity of their midgut**

*D. Bruno<sup>1‡</sup>, M. Bonelli<sup>2‡</sup>, M.C. Valoroso<sup>2</sup>, D. Roma<sup>2</sup>, A. Montali<sup>1</sup>, M.G. Pellegrino<sup>2</sup>, M. Marzari<sup>1</sup>, S. Caccia<sup>2\*</sup>, G. Tettamanti<sup>1,3\*</sup> and M. Casartelli<sup>2,3\*</sup>*

<sup>1</sup>Department of Biotechnology and Life Sciences, University of Insubria, Via J.H. Dunant 3, 21100 Varese, Italy; <sup>2</sup>Department of Biosciences, University of Milano, Via Celoria 26, 20133 Milan, Italy; <sup>3</sup>Interuniversity Center for Studies on Bioinspired Agro-environmental Technology (BAT Center), University of Naples Federico II, Via Università 100, 80055 Portici, Italy; \*[silvia.caccia@unimi.it](mailto:silvia.caccia@unimi.it); [gianluca.tettamanti@uninsubria.it](mailto:gianluca.tettamanti@uninsubria.it); [morena.casartelli@unimi.it](mailto:morena.casartelli@unimi.it)

**Supplementary material**

TABLE S1 Composition of s-OFMSW and modified s-OFMSW. Values are expressed as g/100 g of diet

|                   | s-OFMSW | modified s-OFMSW |
|-------------------|---------|------------------|
| Bread             | 31      | 15               |
| Pork meat         | 18      | 5                |
| Mozzarella cheese | 10      | 5                |
| Banana            | 6       | 15               |
| Pear              | 5       | 15               |
| Apple             | 5       | 15               |
| Carrot            | 13      | 15               |
| Potato            | 12      | 15               |

TABLE S2 Sequences of primers used in this study

| Primer name              | Sequence                      |
|--------------------------|-------------------------------|
| Try_DN11026_F            | GTTGTATTGACCGCTCTACTT         |
| Try_DN11026_R            | GCGGCAGTAACAACAACGTT          |
| Try_DN13300_F            | TTCAAGTACTTTCATCTTAACTGCTGCTC |
| Try_DN13300_R            | TCTTGCCAGTTTTTCGATACTCC       |
| Try_DN11081_F            | TGAGAATGTTGACTGCGCTG          |
| Try_DN11081_R            | TAATCAATGGACCACCAGAG          |
| Chy_DN12383_F            | GCAGCCACTGTTGTTCTTGG          |
| Chy_DN12383_R            | GCTGGCTTCGCTCTTCTTTG          |
| Chy_DN8352_F             | TTCGAGTTCCTGCTGCGAAT          |
| Chy_DN8352_R             | AGCGTTCCTTCCCCATCCTG          |
| Chy_DN8552_F             | CGAAGAAGAAGGTCGCCTCA          |
| Chy_DN8552_R             | ATTAGTGCGTCCCCAACCTG          |
| Chy_DN9167_F             | TCGTCCATGCTGCCTATGATC         |
| Chy_DN9167_R             | TTGCAGATAGGTACGGGCTG          |
| APN_DN10599_F            | CTACAACGGAACCGATCCTG          |
| APN_DN10599_R            | GAATCTGCTCTTCGTCCGTT          |
| APN_DN10282_F            | GAATCACCGAAGGCAGTTCT          |
| APN_DN10282_R            | AACGAATTCCTTCTCGCCTC          |
| $\alpha$ -Am_DN7964-i1_F | TGAAACATCGAAAGCTCCAGAC        |
| $\alpha$ -Am_DN7964-i1_R | ACACGCCGTTGGTCATGATT          |
| $\alpha$ -Am_DN8927_F    | CACAGCTCACGGATTTGCAG          |
| $\alpha$ -Am_DN8927_R    | TGCTCCCATTCCGTTGTATTCA        |
| Li_DN10934_F             | GCCCCAGTTGCATTCATGTC          |
| Li_DN10934_R             | ATTGGTCCGTACACAGCGTT          |
| Li_DN7589_F              | GAAGACGCCCTCCTAACCAC          |
| Li_DN7589_R              | GCCAAGCTCCCACAAGTAGT          |
| Li_DN10724_F             | CCCAACCCACCAGATTACC           |
| Li_DN10724_R             | GAGGCCCCACAAGAAGTCAA          |
| Li_DN8244_F              | GCCCGTAACAACGTTCCAAC          |
| Li_DN8244_R              | GCGCTGAACAATGGAAGAGC          |
| HiRPL5_F                 | AGTCAGTCTTTCCCTCACGA          |
| HiRPL5_R                 | GCGTCAACTCGGATGCTA            |

TABLE S3 Amino acid content (mg/100 g of dry weight) of s-OFMSW, modified s-OFMSW, larvae, and pupae. Essential amino acids are in bold

|                          | s-OFMSW   |          |          | modified s-OFMSW |         |          |
|--------------------------|-----------|----------|----------|------------------|---------|----------|
|                          | Substrate | Larvae   | Pupae    | Substrate        | Larvae  | Pupae    |
| Cysteine                 | 161.93    | 133.82   | 132.43   | 110.98           | 136.61  | 132.59   |
| Tyrosine                 | 477.22    | 1717.21  | 2207.99  | 325.43           | 2092.49 | 2310.06  |
| Glycine                  | 682.12    | 1580.62  | 2108.37  | 466.26           | 1761.4  | 2202.69  |
| Alanine                  | 719.02    | 2425.39  | 2152.1   | 466.43           | 2527.25 | 2207.74  |
| Serine                   | 866.93    | 1413.74  | 1588.77  | 625.21           | 1540.8  | 1640.04  |
| Aspartic acid/Asparagine | 1427.79   | 2459.31  | 3162.33  | 951.36           | 2695.5  | 3056.37  |
| Proline                  | 1470.6    | 1784.63  | 1912.02  | 1052.27          | 1888    | 1981.08  |
| Glutamic acid/Glutamine  | 5129.39   | 3785.61  | 4107.93  | 3626.69          | 3911.44 | 4112.21  |
| <b>Tryptophan</b>        | 208.7     | 518.6    | 676.7    | 165.6            | 517     | 611.3    |
| <b>Methionine</b>        | 253.58    | 377.58   | 483.96   | 174.13           | 475.04  | 475.34   |
| <b>Isoleucine</b>        | 562.63    | 1087.03  | 1220.28  | 388.37           | 1200.62 | 1270.44  |
| <b>Threonine</b>         | 631.76    | 1175.59  | 1335.17  | 435.44           | 1284.49 | 1354.66  |
| <b>Valine</b>            | 753.57    | 1552.83  | 1825.71  | 535.42           | 1757.25 | 1913.45  |
| <b>Histidine</b>         | 760.78    | 1133.28  | 1413.67  | 609.15           | 1470.39 | 1623.61  |
| <b>Phenylalanine</b>     | 778.05    | 1061.36  | 1339.48  | 584.3            | 1280.11 | 1338.9   |
| <b>Arginine</b>          | 785.63    | 1235.12  | 1721.8   | 533.92           | 1601.05 | 1742.06  |
| <b>Lysine</b>            | 1016.23   | 1918.16  | 2205.96  | 634.59           | 2046.24 | 2124.89  |
| <b>Leucine</b>           | 1357.18   | 2054.33  | 2373.86  | 935.43           | 2235.02 | 2384.19  |
| Total                    | 18043.11  | 27414.21 | 31968.53 | 12620.98         | 30420.7 | 32481.62 |

TABLE S4 Detailed relative expression values and statistic data for BSFL midgut genes involved in the digestion of proteins (trypsin- and chymotrypsin-like, aminopeptidase N-like), carbohydrate ( $\alpha$ -amylase-like), and lipid (lipase-like) in larvae grown on the two experimental diets. S = sample
